# Bacterial tail anchors can target to the mitochondrial outer membrane

Güleycan Lutfullahoğlu Bal, Abdurrahman Keskin<sup>1</sup>, Ayşe Bengisu Seferoğlu, and Cory D. Dunn

Department of Molecular Biology and Genetics

Koç University

Sarıyer, İstanbul, 34450

Turkey

<sup>1</sup> Current affiliation:

Department of Biological Sciences

Columbia University

New York, NY 10027

Corresponding author:

Dr. Cory D. Dunn

Koç Üniversitesi

Fen Fakültesi

Rumelifeneri Yolu

Sarıyer, İstanbul 34450

Turkey

Email: [cdunn@ku.edu.tr](mailto:cdunn@ku.edu.tr)

Phone: +90 212 338 1449

Fax: +90 212 338 1559

## MANUSCRIPT TEXT

1  
2 **During the generation and evolution of the eukaryotic cell, a proteobacterial**  
3 **endosymbiont was refashioned into the mitochondrion, an organelle that appears**  
4 **to have been present in the ancestor of all present-day eukaryotes <sup>1</sup>.**  
5 **Mitochondria harbor proteomes derived from coding information located both**  
6 **inside and outside the organelle, and the rate-limiting step toward the formation**  
7 **of eukaryotic cells may have been development of an import apparatus allowing**  
8 **protein entry to mitochondria <sup>2</sup>. Currently, a widely conserved translocon allows**  
9 **proteins to pass from the cytosol into mitochondria <sup>3</sup>, but how proteins encoded**  
10 **outside of mitochondria were first directed to these organelles at the dawn of**  
11 **eukaryogenesis is not clear. Because several proteins targeted by a carboxyl-**  
12 **terminal tail anchor (TA) appear to have the ability to insert spontaneously into**  
13 **the mitochondrial outer membrane (OM) <sup>4-6</sup>, it is possible that self-inserting, tail-**  
14 **anchored polypeptides obtained from bacteria might have formed the first gate**  
15 **allowing proteins to access mitochondria from the cytosol <sup>7</sup>. Here, we tested**  
16 **whether bacterial TAs are capable of targeting to mitochondria. In a survey of**  
17 **proteins encoded by the proteobacterium *Escherichia coli*, predicted TA**  
18 **sequences were directed to specific subcellular locations within the yeast**  
19 ***Saccharomyces cerevisiae*. Importantly, TAs obtained from DUF883 family**  
20 **members ElaB and YqjD were abundantly localized to and inserted at the**  
21 **mitochondrial OM. Our results support the notion that eukaryotic cells have the**  
22 **ability to utilize membrane-targeting signals present in bacterial proteins**  
23 **obtained by lateral gene transfer, and our findings make plausible a model in**  
24 **which mitochondrial protein translocation was first driven by tail-anchored**  
25 **proteins.**

26  
27 During the integration of an  $\alpha$ -proteobacterial endosymbiont within the eukaryotic cell,  
28 genes transferred to the (proto)nucleus were re-targeted to mitochondria, allowing  
29 these organelles to remain the location of crucial cellular processes. In addition, other

30 polypeptides that evolved within the eukaryotic lineage or were acquired through  
31 lateral gene transfer from other organisms were directed to mitochondria. Across  
32 eukaryotes, the  $\beta$ -barrel Tom40 protein forms a pore by which proteins pass through  
33 the OM<sup>3,8,9</sup>. However, the Tom40 polypeptide seems to require already existing TOM  
34 complexes for mitochondrial insertion<sup>10,11</sup>, giving rise to a “chicken or the egg”  
35 dilemma when considering how the TOM complex may have evolved.

36  
37 An early translocation pore that was self-inserting at the mitochondrial surface might  
38 have allowed mitochondria to begin to import proteins, permitting the evolution of an  
39 improved translocon found in eukaryotes today<sup>7</sup>. Current evidence suggests that the  
40 self-insertion of tail-anchored proteins at the mitochondrial OM is possible<sup>4-6</sup>, making  
41 such a scenario tenable. At the inception of mitochondria, such tail-anchored proteins  
42 would likely have been derived from prokaryotes, particularly if mitochondria were  
43 required for the generation of the stereotypical compartmentalized structure of  
44 eukaryotes.

45  
46 We focused our attention upon a single aspect of this hypothesis: can TAs obtained  
47 from bacterial proteins be inserted into the mitochondrial OM when expressed within a  
48 eukaryotic cell? Toward this goal, we selected for analysis 12 *E. coli* proteins predicted  
49 to harbor a solitary  $\alpha$ -helical TM domain at their carboxyl-terminus (Extended Data Fig.  
50 1), then fused mCherry to the amino-terminus of these predicted *E. coli* TAs and  
51 examined their location in *S. cerevisiae* cells by fluorescence microscopy. mCherry-  
52 ElaB(TA) (Fig. 1a) and mCherry-YqjD(TA) (Fig. 1b) were readily detectable at  
53 mitochondria, as reported by sfGFP fused to the TA of the *S. cerevisiae* Fis1  
54 polypeptide, a protein playing a role in yeast mitochondrial division. A lesser fraction of  
55 mCherry-ElaB(TA) and mCherry-YqjD(TA) was localized to the endoplasmic reticulum  
56 (Extended Data Fig. 2). ElaB and YqjD are members of the DUF883 family of proteins.  
57 Little is known about the function of DUF883 family members, but YqjD may recruit  
58 ribosomes to the *E. coli* plasma membrane during stationary phase<sup>12</sup>. Although  
59 negligible fluorescent signal was detectable, mCherry-TcdA(TA) was also localized to

60 mitochondria (Extended Data Fig. 3a). TcdA (also called CsdL) catalyzes the  
61 modification of *E. coli* tRNAs<sup>13</sup>.

62  
63 Other predicted TAs derived from the Flk, YgiM, RfaJ, DjlB, FdnH, NrfR, and YmiA  
64 proteins appeared to allow at least partial localization of mCherry to various locations  
65 associated with the endomembrane system (Extended Data Fig. 4). However, no  
66 convincing localization to mitochondria was apparent after fusing any of these TAs to  
67 mCherry. Moreover, mCherry-YhdV(TA) appeared to be distributed throughout cytosol  
68 and nucleus, indicating failure to target efficiently to any membrane. mCherry-  
69 YgaM(TA) was not detectable, suggesting its degradation.

70  
71 Since our results suggest that the ElaB and YqjD TAs may be competent for insertion  
72 at the mitochondrial OM, we tested whether these TAs can functionally replace the TA  
73 of Fis1p, a domain whose sole purpose is to allow this protein's insertion at the  
74 mitochondrial OM<sup>14,15</sup>. Because Fis1p is required for mitochondrial division in *S.*  
75 *cerevisiae*, *fis1Δ* mutants manifest a highly interconnected network of mitochondria  
76 due to unbalanced mitochondrial fusion<sup>16</sup>. As expected, expression of wild-type Fis1p  
77 restored normal mitochondrial distribution in this genetic background, while Fis1p  
78 prevented from insertion by a A144D substitution within the Fis1p TA<sup>15</sup> could not  
79 restore normal mitochondrial morphology (Figs. 2a and 2b). Strikingly, replacement of  
80 the Fis1p TA with the ElaB or the YqjD TA within the context of full length Fis1p  
81 polypeptide could successfully promote mitochondrial division and restore normal  
82 mitochondrial morphology, while a control TA from the *E. coli* YgiM protein, which is  
83 not trafficked to mitochondria, could not support Fis1p activity. A Fis1-TcdA(TA)  
84 protein could not functionally replace the Fis1p TA in this microcopy-based assay  
85 (Extended Data Fig. 3b), suggesting insufficient expression, poor mitochondrial  
86 insertion, or meager functionality.

87  
88 Next, we sought further evidence for functional insertion of the ElaB and YqjD TAs at  
89 mitochondria using an assay based on cell proliferation<sup>15</sup>. In brief, expression of

90 functional Fis1p in a genetic background initially lacking Fis1p and removed of the  
91 mitochondrial fusogen Fzo1p can lead to unchecked mitochondrial fragmentation, loss  
92 of functional mitochondrial DNA (mtDNA), and a corresponding abrogation of  
93 respiratory competence. As previously reported <sup>15</sup>, expression of wild-type Fis1p in a  
94 *fzo1Δ fis1Δ* genetic background led to an inability to proliferate on nonfermentable  
95 medium, while expression of the poorly inserted Fis1(A144D) variant did not prompt  
96 mtDNA loss (Fig. 2c). The ElaB and YqjD TAs fused to the cytosolic domain of Fis1p  
97 allowed sufficient fission activity to prompt mitochondrial genome deletion from the  
98 same genetic background, again indicating successful ElaB TA and YqjD TA insertion  
99 at the mitochondrial OM. Even the Fis1-TcdA(TA) protein provoked mtDNA loss in  
100 *fzo1Δ fis1Δ* cells (Extended Data Fig. 3c), suggesting some minimal level of OM  
101 insertion. The YgiM TA again appeared unable to recruit Fis1p to mitochondria (Fig.  
102 2c).

103  
104 Our findings, in which several predicted TAs obtained from *E. coli* can target to and  
105 function at the mitochondrial OM of *S. cerevisiae*, make plausible a scenario in which  
106 tail-anchored bacterial proteins contributed to the formation of the earliest  
107 mitochondrial translocon. The structural characteristics of the TAs of ElaB and YqjD, a  
108 helical TM domain rich in glycines followed by a positively charged patch ending in di-  
109 arginine (Extended Data Fig. 1), are evocative of the Fis1p TA, suggesting a similar,  
110 potentially spontaneous mechanism for insertion at mitochondria, although unassisted  
111 insertion of the ElaB and YqjD TAs at the mitochondrial surface has yet to be  
112 demonstrated. Notably, several conserved members of the current TOM complex are  
113 also tail-anchored <sup>17</sup>, raising the possibility that at least some of these proteins could  
114 be "hold-overs" from an early, self-inserting mitochondrial translocon, although we  
115 note that these subunits cannot currently self-insert at mitochondria.

116  
117 Could the DUF883 family of proteins have contributed to an ancestral mitochondrial  
118 OM translocon? While YqjD has been reported to recruit ribosomes to the *E. coli* inner  
119 membrane during stationary phase <sup>12</sup>, a role in line with promotion of co-translational

120 protein import into mitochondria <sup>18,19</sup>, the DUF883 family is not readily identified in  
121 eukaryotic genomes. One might expect, however, that once a more proficient TOM  
122 complex centered around the Tom40 pore evolved, a previous translocon would have  
123 been lost, or even selected against if it were to interfere with more rapid protein import  
124 through an improved OM translocation machinery. Moreover, an inordinate focus on  
125 DUF883 family members when seeking components of the earliest mitochondrial  
126 translocon may not be warranted in any case, since the structural characteristics likely  
127 required for TA insertion at mitochondria might be easily generated from random open  
128 reading frame fragments containing a transmembrane domain. Analogously, random  
129 sequences from bacteria are readily able to act as amino-terminal mitochondrial  
130 targeting sequences <sup>20-22</sup>. If TAs are easily evolved and might recruit other functional  
131 domains to the mitochondrial surface, then identifying orthologs of initial tail-anchored  
132 translocon components from existing prokaryotic sequences might be difficult, since  
133 an untold number of TAs might be predicted among putative open-reading frames.  
134 Supporting the idea that mitochondrial TAs might be easily generated from sequences  
135 not actually functioning in membrane targeting within their native bacterial  
136 environment, we demonstrated limited mitochondrial targeting and partial functionality  
137 of the computationally predicted TcdA TA in yeast, even though TcdA is unlikely to be  
138 membrane-inserted in *E. coli* <sup>23</sup>.

139

140 If conversion of endosymbiont to mitochondria were the rare and essential event  
141 required for generation of eukaryotes, and if insertion of bacteria-derived, tail-anchored  
142 proteins at the OM to form an ancestral translocon were necessary for this conversion,  
143 then the question of how hospitable an environment the early mitochondria OM might  
144 have been for bacteria-derived TAs comes to the fore. Indeed, the membrane into  
145 which tail-anchored proteins are inserted can be at least partially determined by their  
146 lipid environment <sup>4</sup>, and lipids utilized by many characterized archaea are  
147 fundamentally different in structure from bacterial and eukaryotic lipids <sup>24</sup>. However,  
148 recent evidence indicates that archaeal clades potentially related to the last eukaryotic  
149 common ancestor might have been characterized by membranes more similar to those

150 of bacteria than of those membranes more typically found in archaea<sup>25</sup>. This finding  
151 raises the possibility that the protoeukaryote's specific cohort of lipids was crucial to  
152 the ability to form complexes of bacteria-derived tail-anchored proteins at the  
153 mitochondrial OM that would allow full integration of mitochondria within the ancestral  
154 eukaryote.

155  
156 Finally, we have not examined in detail the trafficking of *E. coli* TAs that appeared to  
157 localize to the endomembrane system during our initial survey. However, the diverse  
158 organellar locations to which these TAs were localized supports previous data  
159 indicating that eukaryotes may derive organelle targeting information from newly  
160 acquired prokaryotic proteins or protein fragments, perhaps even from amino acid  
161 sequences previously unselected for targeting proficiency<sup>20-22,26,27</sup>. Lateral gene transfer  
162 promotes the evolution of novel functions in prokaryotes<sup>28</sup> and was certainly present in  
163 the form of endosymbiotic gene transfer during early eukaryogenesis. Indeed,  
164 proficiency in making use of cryptic or explicit targeting information in order to direct  
165 newly acquired, nucleus-encoded proteins to the distinct subcellular locations where  
166 they might be best utilized might have provided a significant selective advantage to the  
167 early eukaryote. Such a scenario may be particularly relevant if some amount of cellular  
168 compartmentalization already existed in a pre-eukaryotic host cell before conversion of  
169 pre-mitochondrial endosymbiont to organelle<sup>29,30</sup>.

170

171  
172  
173  
174  
175  
176  
177  
178  
179  
180  
181  
182  
183  
184  
185  
186  
187

## METHODS

**Yeast strains, plasmids, and culture conditions.** Culture conditions are as described in <sup>15</sup>, and all experiments have been carried out at 30°C.

**Microscopy.** Microscopy was performed on logarithmic phase cultures as in <sup>15</sup>, with exposure times determined automatically. mCherry fusions are driven by the *ADH1* promoter and universally contain Fis1p amino acids 119-128 (not necessary or sufficient for mitochondrial targeting) linking mCherry to each TA, and genetic assessment of Fis1p variant functionality was performed as described in <sup>15</sup>. The brightness of all images of mCherry expression was adjusted in Adobe Photoshop CS5 (Adobe, San Jose, California) to an equivalent extent. Scoring of mitochondrial morphology was performed blind to genotype.

**Proliferation-based assessment of Fis1p functionality.** Genetic tests of Fis1p functionality in cells lacking Fis1p and Fzo1p were performed as in <sup>15</sup>.



188

## REFERENCES

189

- 190 1. Hjort, K., Goldberg, A. V., Tsaousis, A. D., Hirt, R. P. & Embley, T. M. Diversity  
191 and reductive evolution of mitochondria among microbial eukaryotes. *Philos.*  
192 *Trans. R. Soc. Lond., B, Biol. Sci.* **365**, 713–727 (2010).
- 193 2. Booth, A. & Doolittle, W. F. Eukaryogenesis, how special really? *Proceedings of*  
194 *the National Academy of Sciences* **112**, 10278–10285 (2015).
- 195 3. Mani, J., Meisinger, C. & Schneider, A. Peeping at TOMs-Diverse Entry Gates to  
196 Mitochondria Provide Insights into the Evolution of Eukaryotes. *Mol Biol Evol* **33**,  
197 337–351 (2016).
- 198 4. Krumpke, K. *et al.* Ergosterol content specifies targeting of tail-anchored proteins  
199 to mitochondrial outer membranes. *Mol Biol Cell* **23**, 3927–3935 (2012).
- 200 5. Kemper, C. *et al.* Integration of tail-anchored proteins into the mitochondrial  
201 outer membrane does not require any known import components. *Journal of Cell*  
202 *Science* **121**, 1990–1998 (2008).
- 203 6. Setoguchi, K., Otera, H. & Mihara, K. Cytosolic factor- and TOM-independent  
204 import of C-tail-anchored mitochondrial outer membrane proteins. *EMBO J* **25**,  
205 5635–5647 (2006).
- 206 7. Renthal, R. Helix insertion into bilayers and the evolution of membrane proteins.  
207 *Cell. Mol. Life Sci.* **67**, 1077–1088 (2009).
- 208 8. Shiota, T. *et al.* Molecular architecture of the active mitochondrial protein gate.  
209 *Science* **349**, 1544–1548 (2015).
- 210 9. Hill, K. *et al.* Tom40 forms the hydrophilic channel of the mitochondrial import  
211 pore for preproteins [see comment]. *Nature* **395**, 516–521 (1998).
- 212 10. Rapaport, D. & Neupert, W. Biogenesis of Tom40, core component of the TOM  
213 complex of mitochondria. *J Cell Biol* **146**, 321–331 (1999).
- 214 11. Model, K. *et al.* Multistep assembly of the protein import channel of the  
215 mitochondrial outer membrane. *Nat. Struct. Biol.* **8**, 361–370 (2001).
- 216 12. Yoshida, H. *et al.* YqjD is an inner membrane protein associated with stationary-  
217 phase ribosomes in *Escherichia coli*. *J Bacteriol* **194**, 4178–4183 (2012).

- 218 13. Miyauchi, K., Kimura, S. & Suzuki, T. A cyclic form of N6-  
219 threonylcarbamoyladenine as a widely distributed tRNA hypermodification.  
220 *Nature Chemical Biology* 1–9 (2012). doi:10.1038/nchembio.1137
- 221 14. Habib, S. J., Vasiljev, A., Neupert, W. & Rapaport, D. Multiple functions of tail-  
222 anchor domains of mitochondrial outer membrane proteins. *FEBS Lett* **555**, 511–  
223 515 (2003).
- 224 15. Keskin, A., Akdoğan, E. & Dunn, C. D. Evidence for Amino Acid Snorkeling from a  
225 High-Resolution, In Vivo Analysis of Fis1 Tail Anchor Insertion at the  
226 Mitochondrial Outer Membrane. *Genetics* (2017).  
227 doi:10.1534/genetics.116.196428/-/DC1
- 228 16. Mozdy, A. D., McCaffery, J. M. & Shaw, J. M. Dnm1p GTPase-mediated  
229 mitochondrial fission is a multi-step process requiring the novel integral  
230 membrane component Fis1p. *J Cell Biol* **151**, 367–380 (2000).
- 231 17. Burri, L. & Lithgow, T. A Complete Set of SNAREs in Yeast. *Traffic* **5**, 45–52  
232 (2003).
- 233 18. Verner, K. Co-translational protein import into mitochondria: an alternative view.  
234 *Trends in Biochemical Sciences* **18**, 366–371 (1993).
- 235 19. Williams, C. C., Jan, C. H. & Weissman, J. S. Targeting and plasticity of  
236 mitochondrial proteins revealed by proximity-specific ribosome profiling. *Science*  
237 **346**, 748–751 (2014).
- 238 20. Baker, A. & Schatz, G. Sequences from a prokaryotic genome or the mouse  
239 dihydrofolate reductase gene can restore the import of a truncated precursor  
240 protein into yeast mitochondria. *Proc Natl Acad Sci USA* **84**, 3117–3121 (1987).
- 241 21. Lemire, B. D., Fankhauser, C., Baker, A. & Schatz, G. The mitochondrial targeting  
242 function of randomly generated peptide sequences correlates with predicted  
243 helical amphiphilicity. *J Biol Chem* **264**, 20206–20215 (1989).
- 244 22. Lucattini, R., Likic, V. A. & Lithgow, T. Bacterial proteins predisposed for  
245 targeting to mitochondria. *Mol Biol Evol* **21**, 652–658 (2004).
- 246 23. Kim, S., Lee, H. & Park, S. The Structure of Escherichia coli TcdA (Also Known As  
247 CsdL) Reveals a Novel Topology and Provides Insight into the tRNA Binding

- 248 Surface Required for N6-Threonylcarbamoyladenosine Dehydratase Activity. *J*  
249 *Mol Biol* **427**, 3074–3085 (2015).
- 250 24. Lombard, J., López-García, P. & Moreira, D. The early evolution of lipid  
251 membranes and the three domains of life. *Nat Rev Microbiol* **10**, 507–515 (2012).
- 252 25. Villanueva, L., Schouten, S. & Damsté, J. S. S. Phylogenomic analysis of lipid  
253 biosynthetic genes of Archaea shed light on the ‘lipid divide’. *Environ Microbiol*  
254 **19**, 54–69 (2016).
- 255 26. Hall, J., Hazlewood, G. P., Surani, M. A., Hirst, B. H. & Gilbert, H. J. Eukaryotic  
256 and prokaryotic signal peptides direct secretion of a bacterial endoglucanase by  
257 mammalian cells. *J Biol Chem* **265**, 19996–19999 (1990).
- 258 27. Walther, D. M., Papic, D., Bos, M. P., Tommassen, J. & Rapaport, D. Signals in  
259 bacterial beta-barrel proteins are functional in eukaryotic cells for targeting to  
260 and assembly in mitochondria. *Proceedings of the National Academy of Sciences*  
261 **106**, 2531–2536 (2009).
- 262 28. Treangen, T. J. & Rocha, E. P. C. Horizontal Transfer, Not Duplication, Drives the  
263 Expansion of Protein Families in Prokaryotes. *PLoS Genet* **7**, e1001284–12  
264 (2011).
- 265 29. Pittis, A. A. & Gabaldón, T. Late acquisition of mitochondria by a host with  
266 chimaeric prokaryotic ancestry. *Nature* **531**, 101–104 (2016).
- 267 30. Zaremba-Niedzwiedzka, K. *et al.* Asgard archaea illuminate the origin of  
268 eukaryotic cellular complexity. *Nature* **541**, 353–358 (2017).
- 269 31. The UniProt Consortium. UniProt: the universal protein knowledgebase. *Nucleic*  
270 *Acids Res* **45**, D158–D169 (2017).
- 271 32. Krogh, A., Larsson, B., Heijne, von, G. & Sonnhammer, E. L. L. Predicting  
272 transmembrane protein topology with a hidden markov model: application to  
273 complete genomes<sup>11</sup>Edited by F. Cohen. *J Mol Biol* **305**, 567–580 (2001).
- 274 33. DeLoache, W. C., Russ, Z. N. & Dueber, J. E. Towards repurposing the yeast  
275 peroxisome for compartmentalizing heterologous metabolic pathways. *Nature*  
276 *Communications* **7**, 1–11 (2016).
- 277

278  
279

## EXTENDED DATA FIGURES

280 **Extended Data Figure 1 | A list of predicted TAs examined in this study.** FASTA  
281 sequences from the *E. coli* proteome were retrieved from UniProt<sup>31</sup> and subjected to  
282 analysis using the TMHMM 2.0 server<sup>32</sup>. Polypeptides with a single predicted TM  
283 domain (denoted by purple line), harboring 15 or less amino acids carboxyl-terminal to  
284 the TM domain, and containing more than 30 amino acids amino-terminal to the TM  
285 domain were selected for further analysis. Charged amino acids are also denoted. The  
286 UniProt accession number and names of selected proteins are provided. For purposes  
287 of sequence comparison, the relevant portion of the *S. cerevisiae* Fis1p TA is also  
288 shown.

289

290 **Extended Data Figure 2 | The predicted ElaB and YqjD TAs can also be visualized**  
291 **at the endoplasmic reticulum.** Cells were analyzed as in Figure 1, except BY4741  
292 was transformed with plasmid pJK59, expressing Sec63-GFP, before mating.

293

294 **Extended Data Figure 3 | The predicted TcdA TA allows minimal localization to,**  
295 **and function at, the mitochondrial outer membrane. a,** The predicted TcdA TA can  
296 be visualized at mitochondria. Strain BY4741, harboring plasmid b294 (sfGFP-Fis1p),  
297 was mated to strain BY4742 carrying mCherry-TcdA(TA)-expressing plasmid b281 and  
298 the resulting diploids were imaged by fluorescence microscopy. Scale bar, 5  $\mu$ m. **b,**  
299 Fis1p with its own TA replaced by the predicted TcdA TA cannot promote normal  
300 mitochondrial morphology. *fis1* $\Delta$  strain CDD741, expressing mitochondria-targeted  
301 GFP from plasmid pHS12, was transformed with empty vector pRS313 or plasmids  
302 expressing wild-type Fis1p (b239), Fis1(A144D)p (b244), or Fis1-TcdA(TA)p (b319) and  
303 mitochondrial morphology was assessed by fluorescence microscopy. Scale bar, 5  $\mu$ m.  
304 **c,** Fis1-TcdA(TA)p can allow mitochondrial division. Strain CDD688 was transformed  
305 with the plasmids used in (b) or a plasmid expressing Fis1-YgiM(TA)p (b316) and  
306 examined as in Fig. 2c, except that culture on medium counter-selective for Fis1p  
307 activity was carried out for 5d.

308

309 **Extended Data Figure 4 | Not all predicted *E. coli* TAs are localized to**  
310 **mitochondria in *S. cerevisiae*.** Strain CDD961 was transformed with plasmids  
311 expressing (a) mCherry-Flk(TA) (b273), (b) mCherry-YhdV(TA) (b277), (c) mCherry-  
312 RfaJ(RA) (b278), (d) mCherry-DjIB(TA) (b280), (e) mCherry-FdnH(TA) (b331), (f)  
313 mCherry-NrfF(TA) (b332), (g) mCherry-YmiA(TA) (b333) and examined by fluorescence  
314 microscopy. (h) Strain BY4741, carrying plasmid b311 expressing sfGFP fused to the  
315 enhanced PTS1 sequence<sup>33</sup>, was mated to strain BY4742, containing the mCherry-  
316 YgiM(TA)-expressing plasmid b274, and the resulting diploids were imaged.

317

318 **Supplementary Information 1 | Strains, plasmids, and oligonucleotides used**  
319 **during this study.**

320

321

## **ACKNOWLEDGEMENTS**

322

323 We thank Thomas Richards and Jeremy Wideman for comments on this manuscript.

324 This work was supported by a European Research Council Starting Grant (637649-

325 RevMito) to C.D.D., by a Turkish Academy of Sciences Outstanding Young Scientist

326 Award (TÜBA-GEBİP) to C.D.D., and by Koç University.

327

328

## **AUTHOR CONTRIBUTIONS**

329

330 C.D.D. designed the study, wrote the manuscript, and performed experiments. G.L.B.,

331 A.K., and A.B.S. performed experiments, generated reagents, and provided manuscript

332 critiques.

333

334

## **AUTHOR INFORMATION**

335

336 The authors declare no competing financial interest and have no known conflict of

337 interest affecting the outcome or interpretation of this study. Correspondence and

338 requests for materials should be addressed to C.D.D. (cdunn@ku.edu.tr).

339

340

## FIGURE LEGENDS

341

342 **Figure 1 | The predicted ElaB and YqjD TAs localize to mitochondria.** Strain  
343 BY4741, harboring plasmid b294 (sfGFP-Fis1p), was mated to strain BY4742 carrying  
344 mCherry-ElaB(TA)-expressing plasmid b275 (**a**) or strain BY4742 carrying mCherry-  
345 YqjD(TA)-expressing plasmid b279 (**b**). The resulting diploids were visualized by  
346 fluorescence microscopy. Scale bar, 5 $\mu$ m.

347

348 **Figure 2 | Mitochondria-localized bacterial TAs can functionally replace the TA of**  
349 **Fis1p. a,** The ElaB and YqjD TAs can replace the Fis1p TA in promoting normal  
350 mitochondrial morphology. *fis1* $\Delta$  strain CDD741, expressing mitochondria-targeted  
351 GFP from plasmid pHS12, was transformed with empty vector pRS313 or plasmids  
352 expressing wild-type Fis1p (b239), Fis1(A144D)p (b244), or Fis1p with its own TA  
353 replaced by that of ElaB (b317), YqjD (b318), or YgiM (b316). Cells were examined by  
354 fluorescence microscopy. Scale bar, 5 $\mu$ m. **b,** Quantification of mitochondrial  
355 morphology of the transformants from (**a**) was performed blind to genotype. White bar  
356 represents cells with fully networked mitochondria, grey bar represents cells with  
357 mitochondria not fully networked, but networked to a greater extent than wild-type  
358 cells, and black bar represents cells with normal mitochondrial morphology.  
359 Quantification was repeated three times ( $n > 200$  per genotype), and a representative  
360 experiment is shown. **c,** Genetic assessment of Fis1p variant functionality. Strain  
361 CDD688 was transformed with the plasmids in (**a**) and proliferation was assessed  
362 without selection against Fis1p activity (YPALac medium for 2d) and following counter-  
363 selection for cells carrying functional Fis1p (SLac-His+CHX medium for 4d).

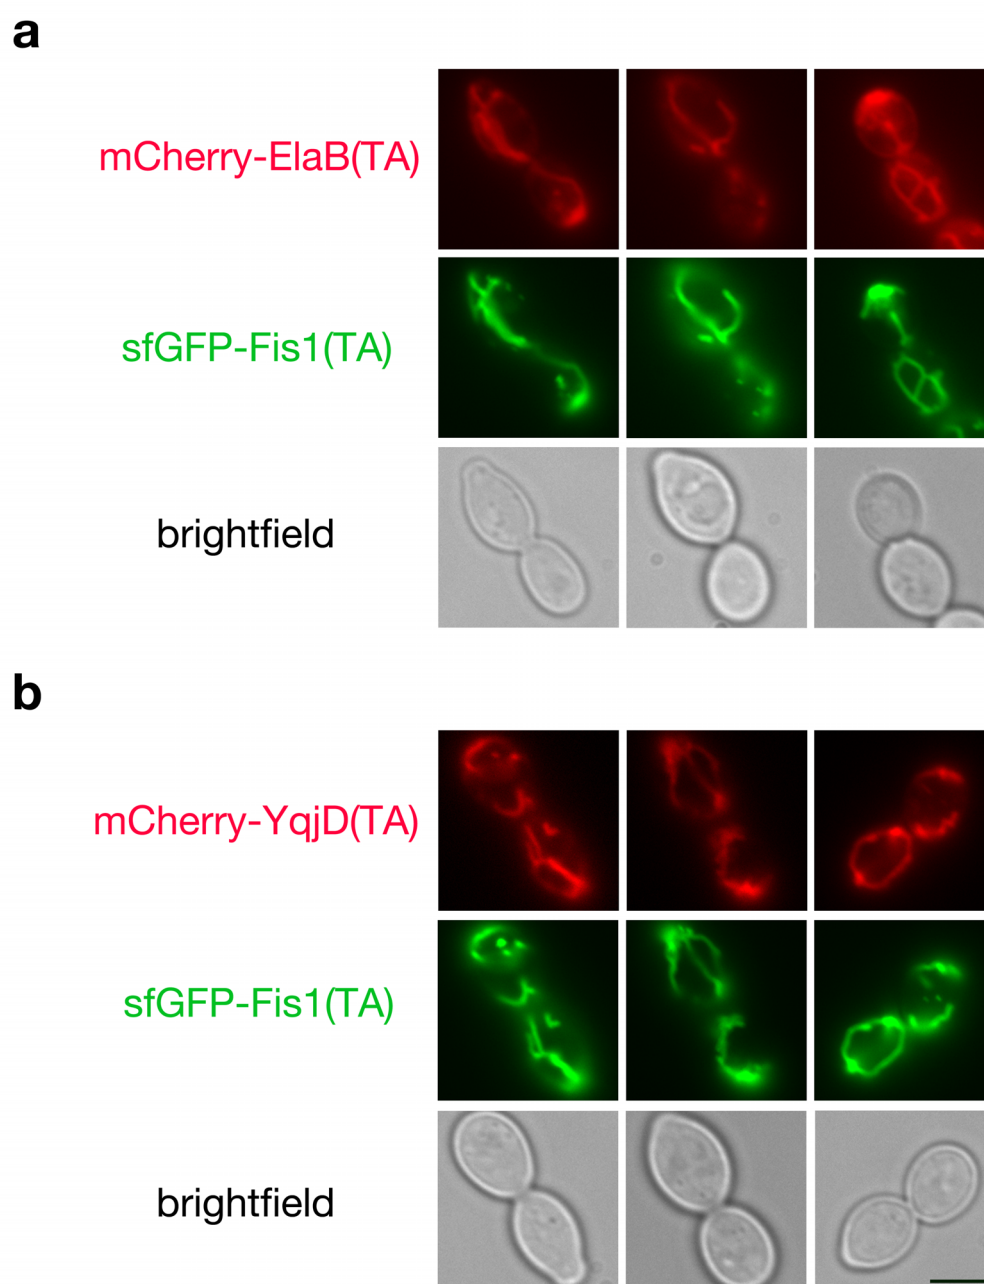

Fig. 1



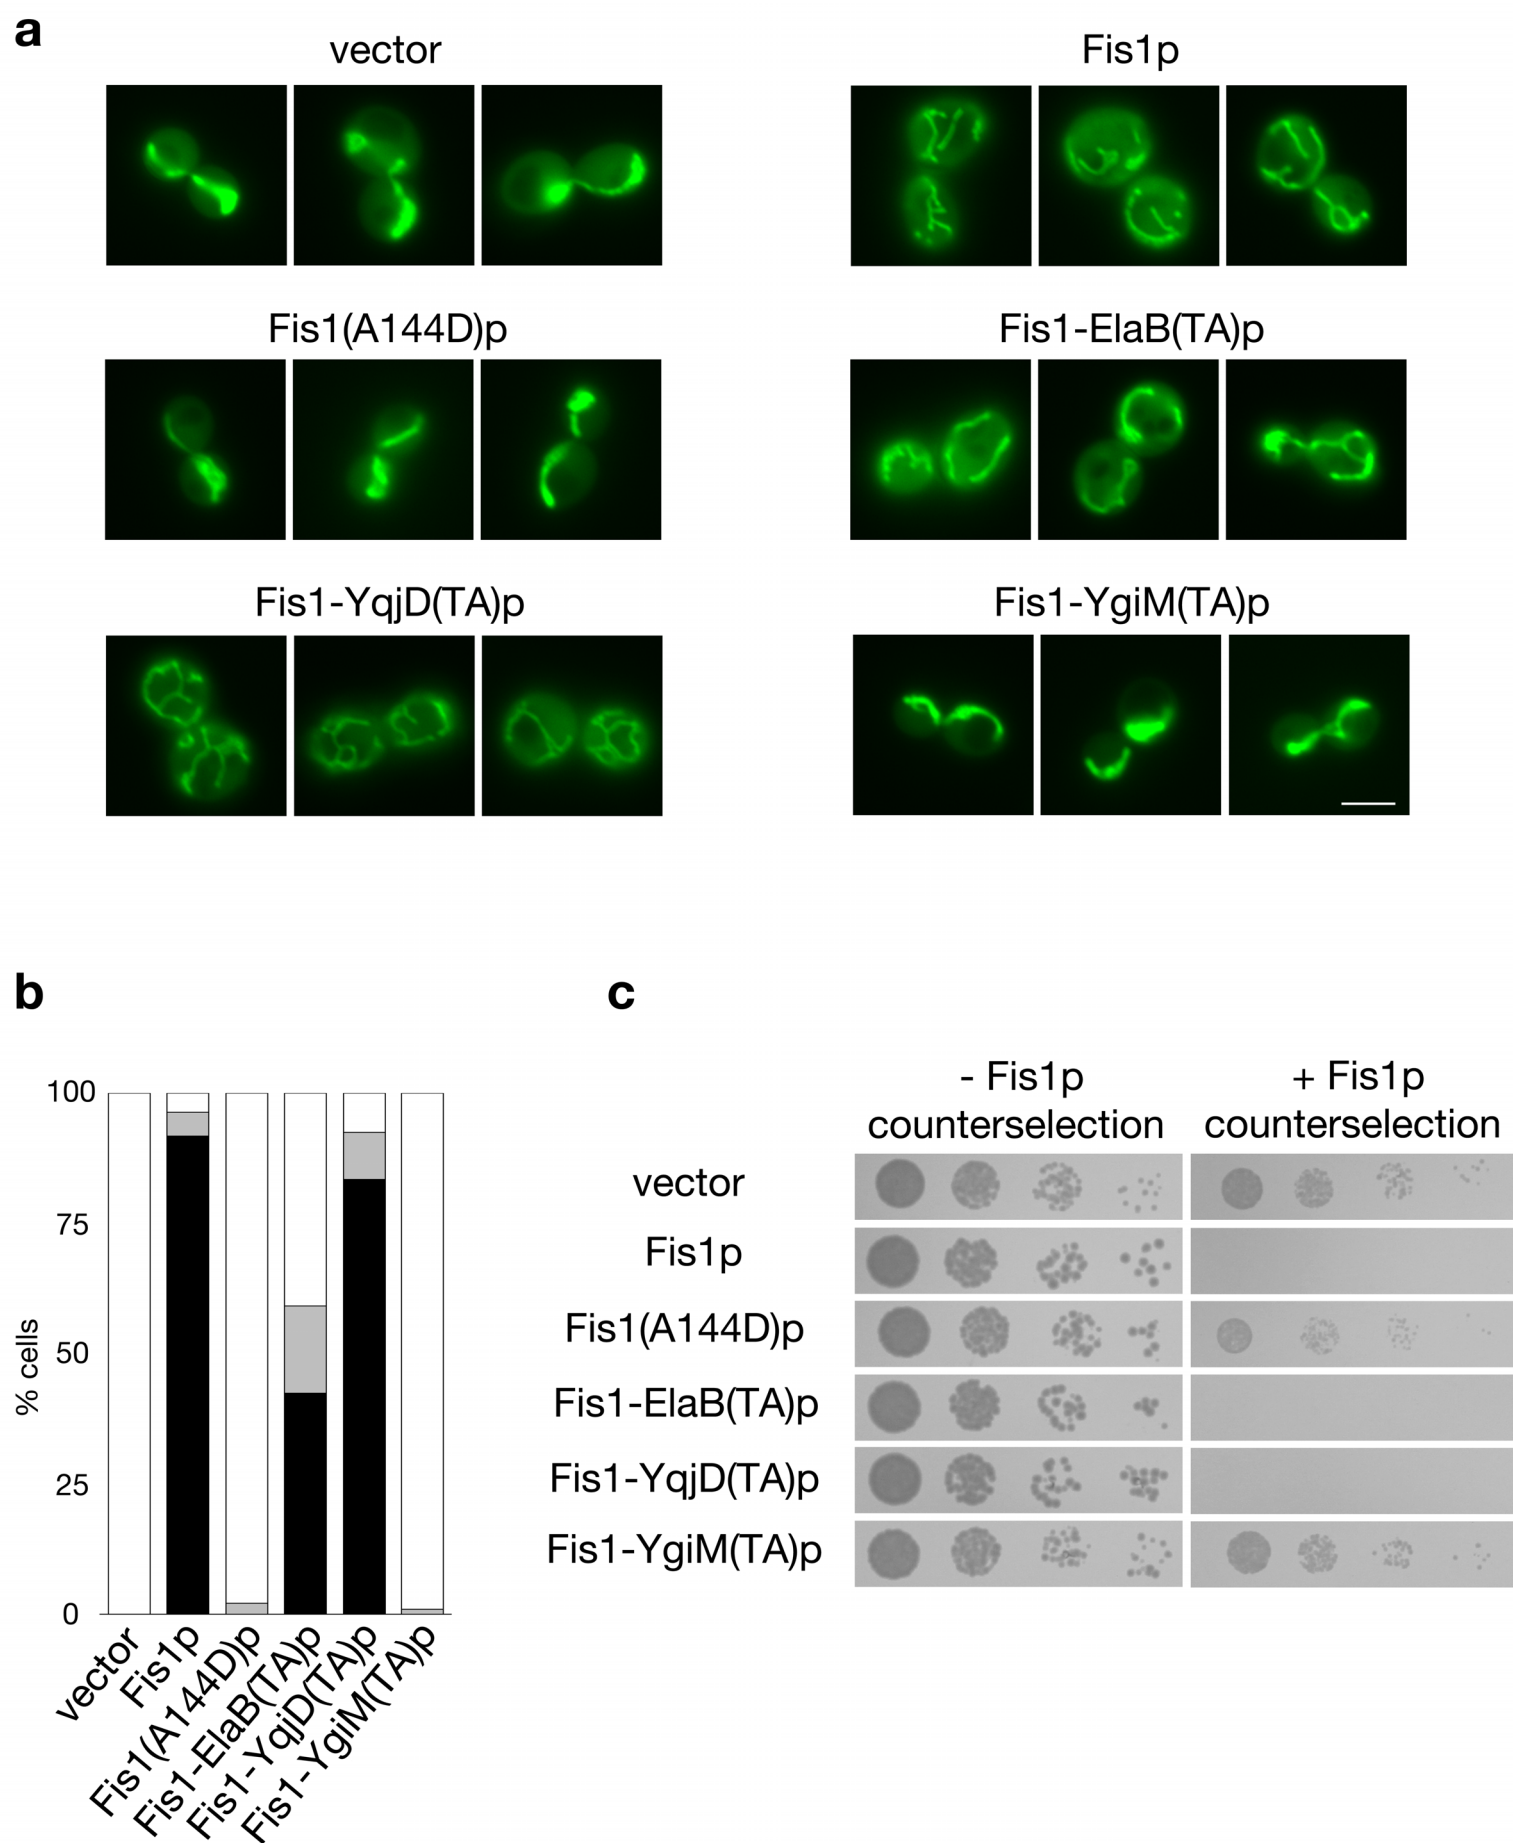

Fig. 2

|        |      |                                                                     |
|--------|------|---------------------------------------------------------------------|
| P15286 | Fik  | <u>PALWILLVAIILMLVWLVR</u> <sup>+</sup>                             |
| P64622 | YhdV | <u>TAGAIAGGAAAVAGLTMGIIALSK</u> <sup>+</sup>                        |
| P27129 | RfaJ | <u>LVQHHYISGIIAGVCYLCRKYYRK</u> <sup>++ ++</sup>                    |
| P77381 | DjIB | <u>LGIKIIFYIFIFAGLIGKILHLFG</u>                                     |
| P0AAJ3 | FdnH | <u>LAAAGFIATFAGLIFHYIGIGPNKEVDDDEEDHHE</u> <sup>+ - - - - - -</sup> |
| P32711 | NrfF | <u>TGQTLVLWALPVVLLLLMALILWRVRAKR</u> <sup>+ + + +</sup>             |
| P0CB62 | YmiA | <u>WLAVFLGSALFWVWVALLIWKVWG</u>                                     |
| P0ADT8 | YgiM | <u>WFMYGGGVLGLGLLLGLVLPHLIPSRKRKDRWMN</u> <sup>++++ - +</sup>       |
| P0ADQ7 | YgaM | <u>GTAAAVGIFIGALLSMRKS</u> <sup>++</sup>                            |
| Q46927 | TcdA | <u>ASGFGAATMVTATFGFVAVSHALKKMMAKAARQG</u> <sup>++ + +</sup>         |
| P0AEH5 | ElaB | <u>PWQGIGVGAAVGLVLGLLLARR</u> <sup>++</sup>                         |
| P64581 | YqjD | <u>WTGVGIGAAIGVVLGVLLSRR</u> <sup>++</sup>                          |
| P40515 | Fis1 | <u>LKGWVAGGVLGAVAVASFFLRNKRR</u> <sup>+ +++</sup>                   |

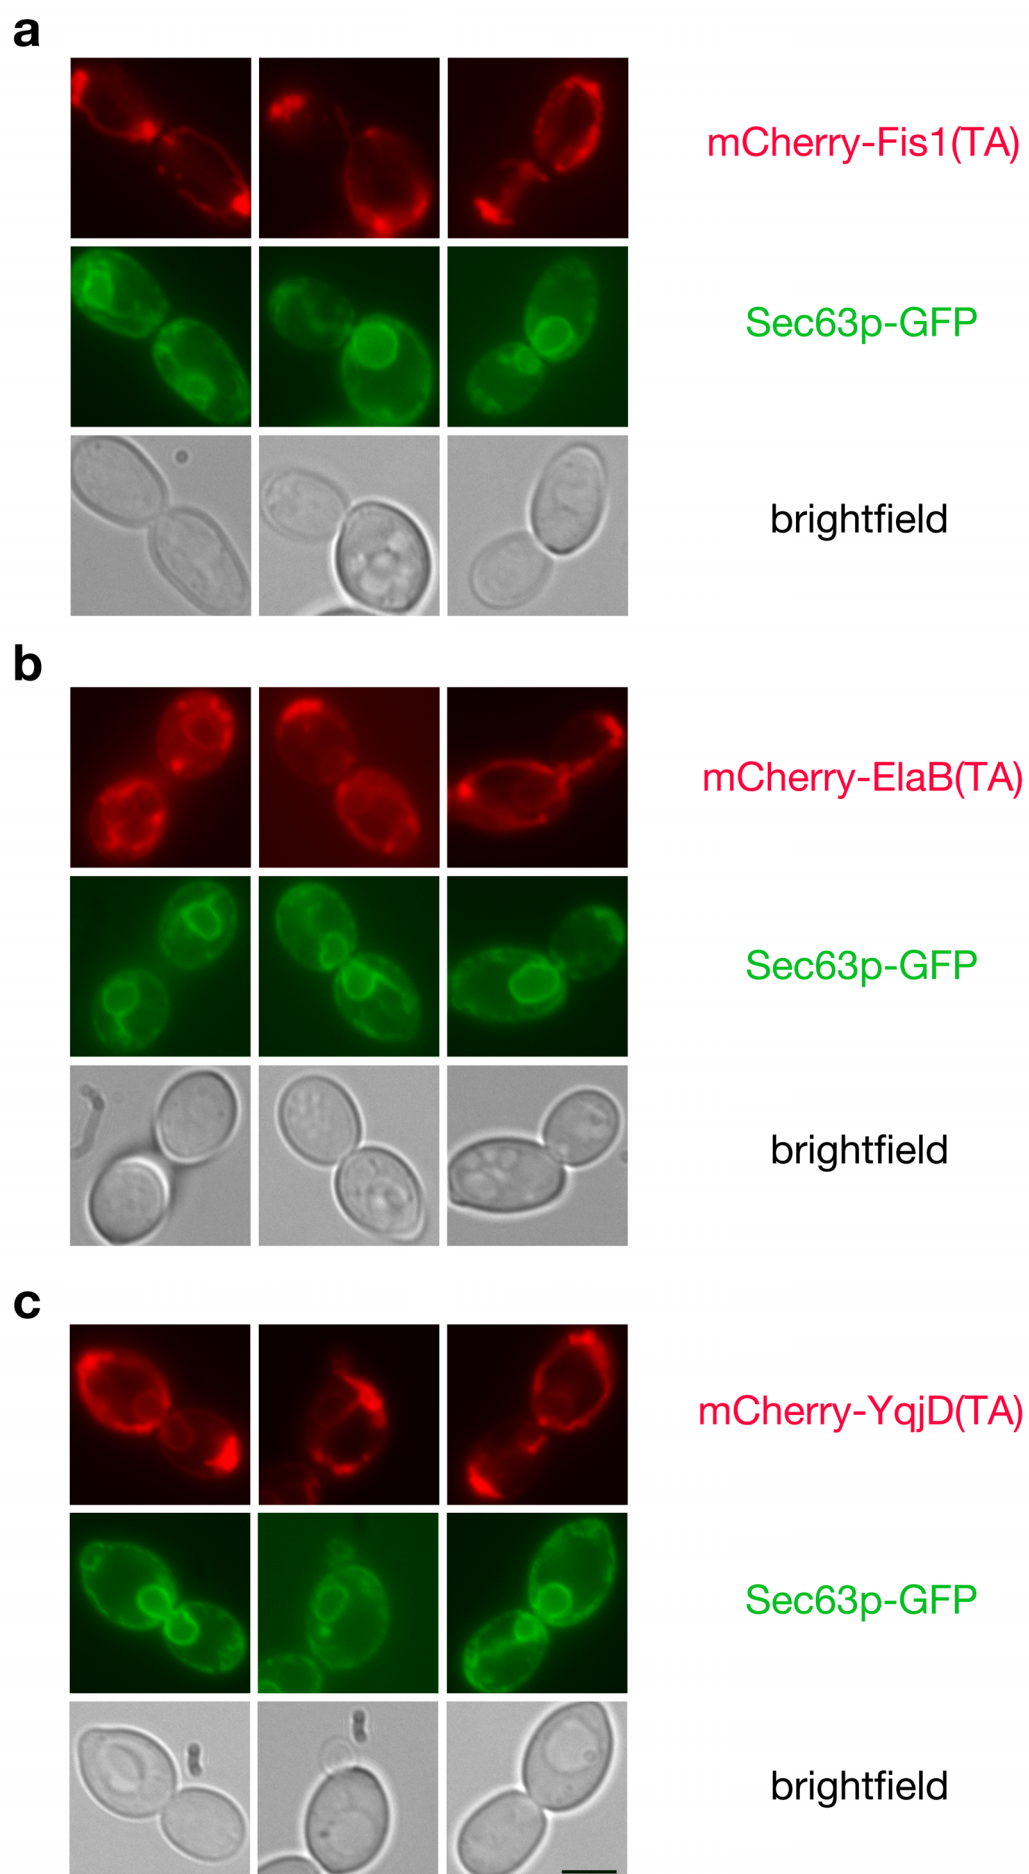

Extended Data Fig. 2

**a**

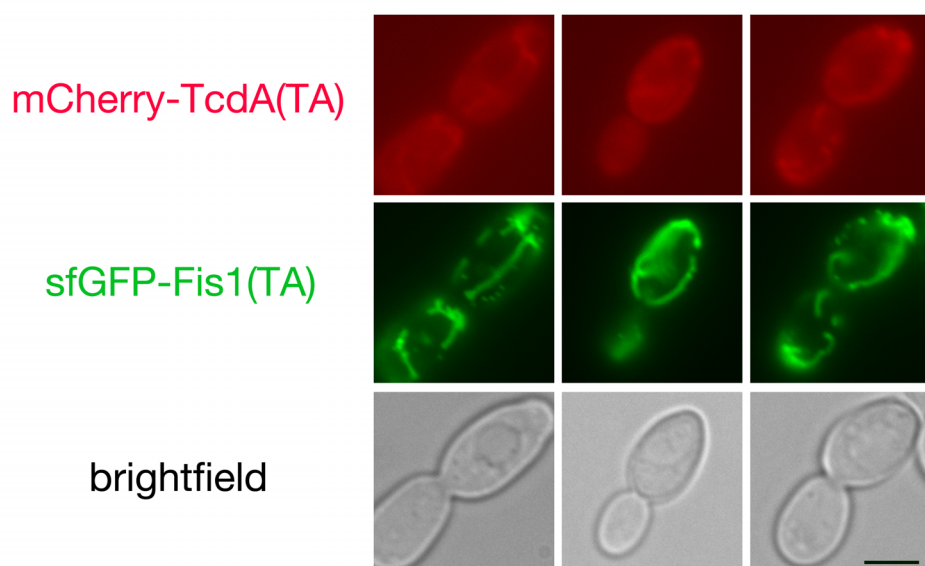

**b**

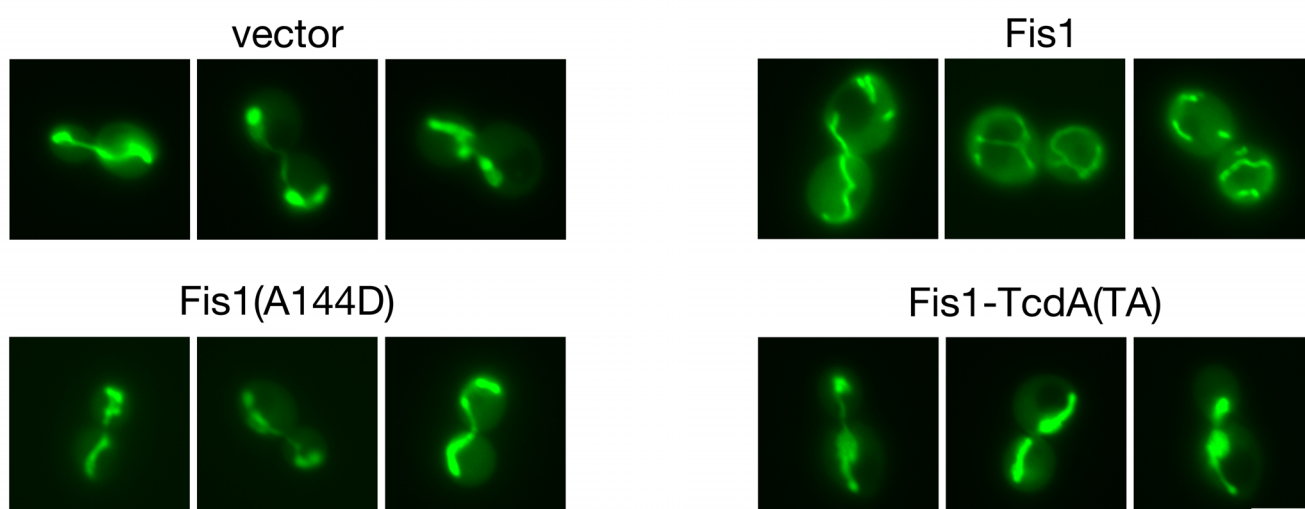

**c**

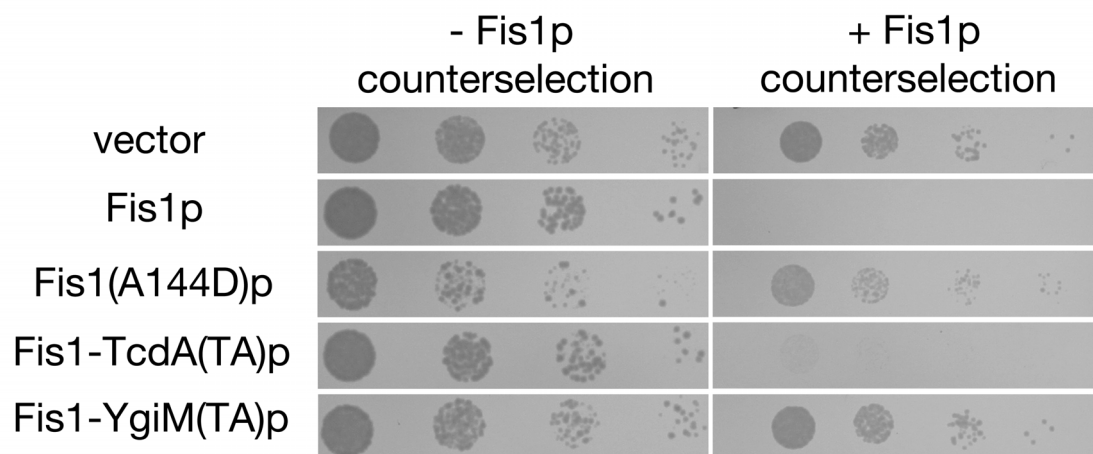

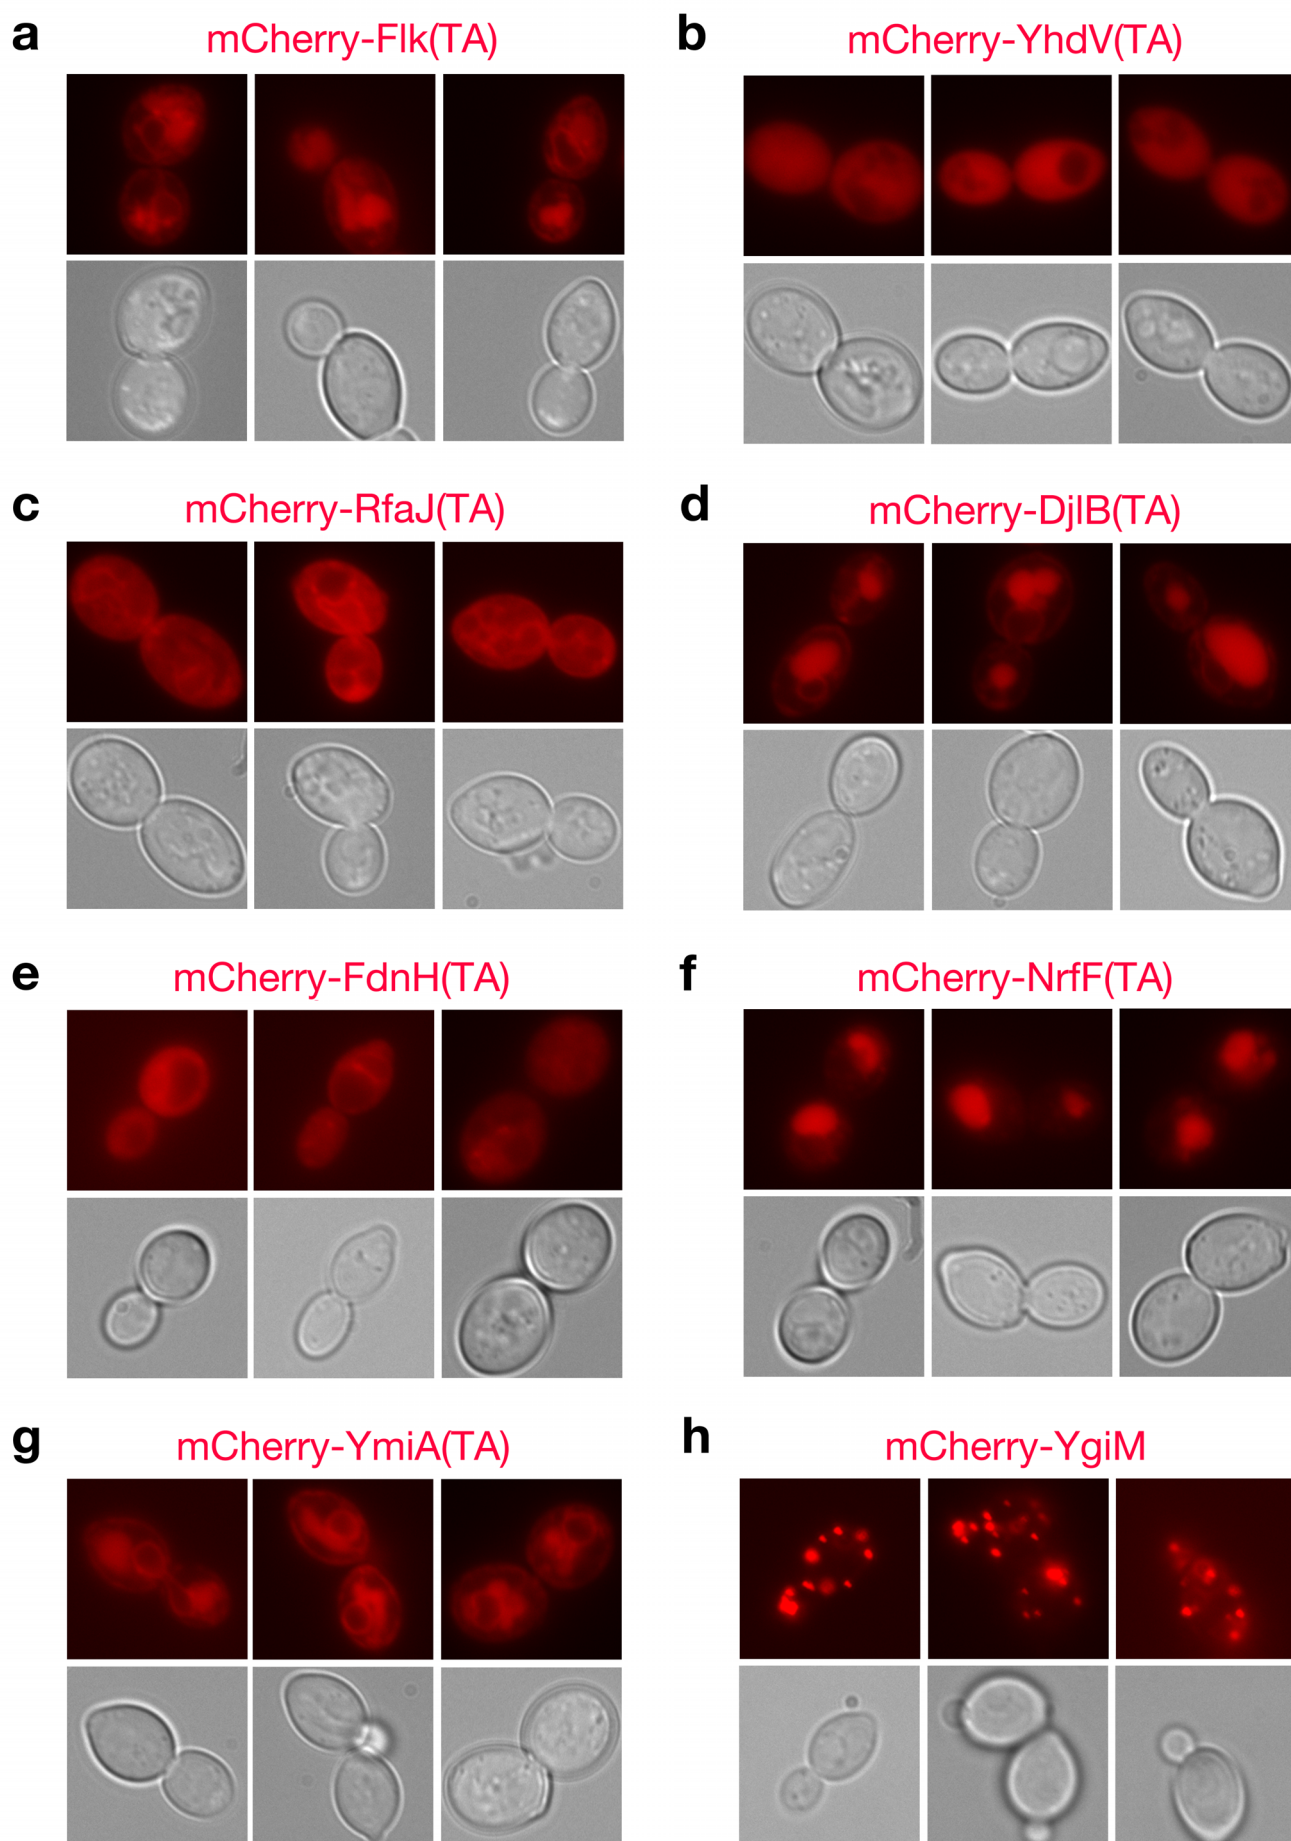

Extended Data Fig. 4
